# Supplementary material
Source: PubMed Central journal article supplement (PMC8020570)
Supplement: mmc1.pdf [file mmc1.pdf]

# Appendix

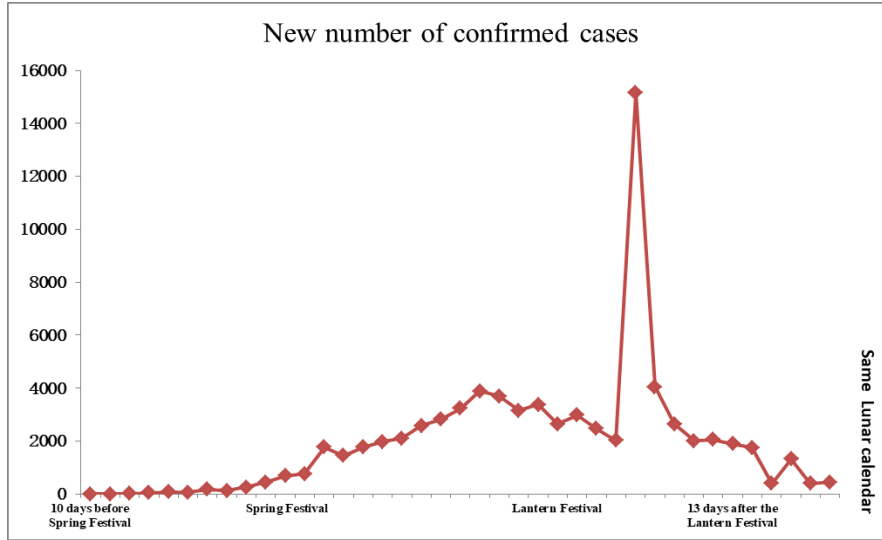

**Fig. A: Numbers of new confirmed cases in China within the Lunar Calendar**

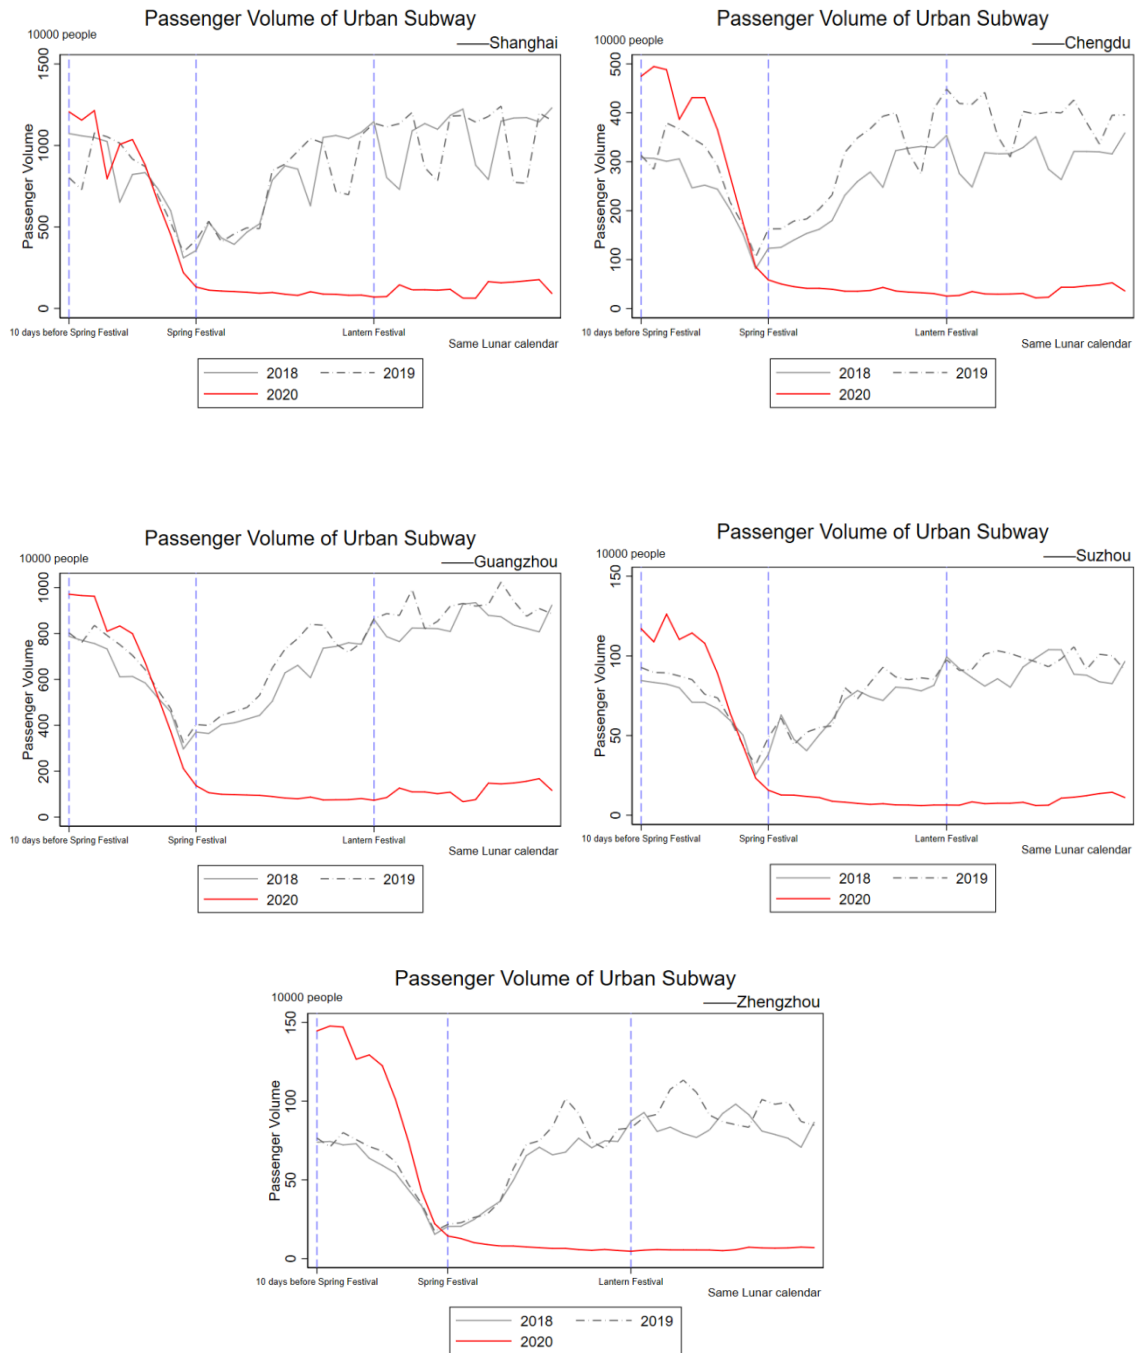

**Fig. B: Passenger Volume of Urban Subway in five cities**

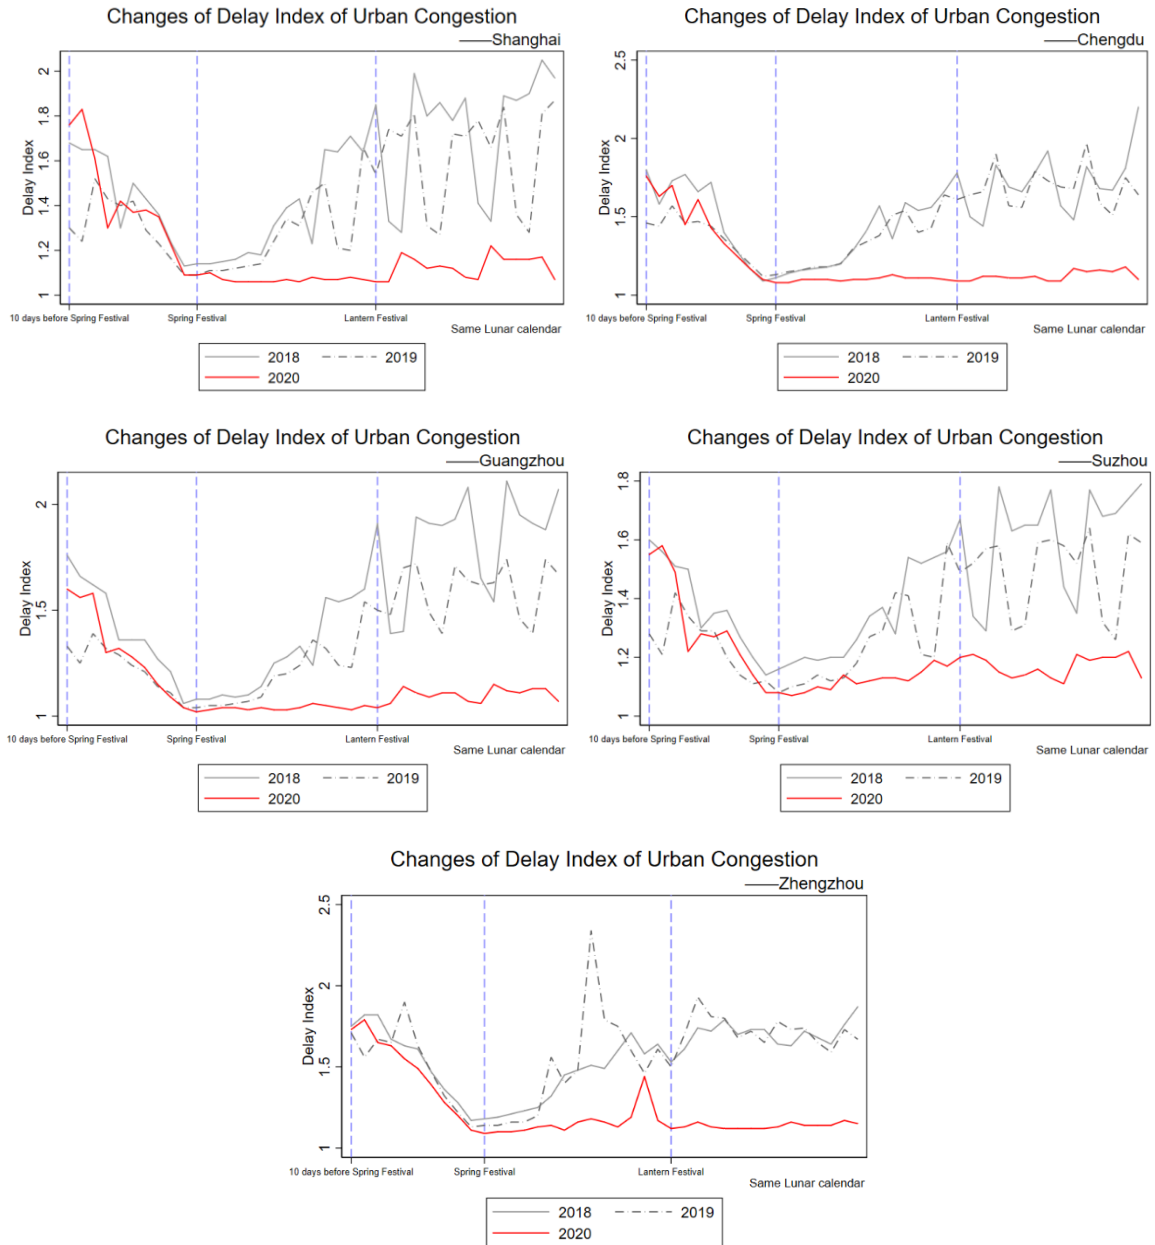

**Fig. C: Changes of Delay Index of Urban Congestion in five cities**

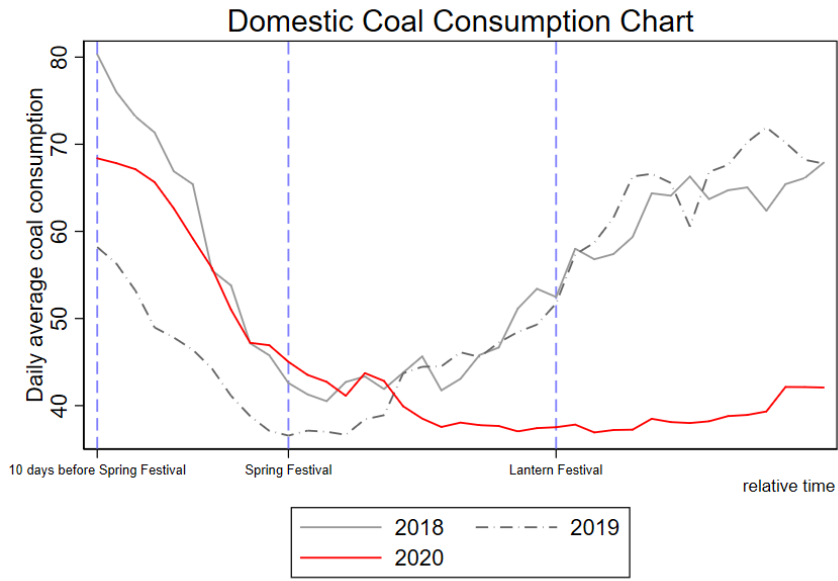

**Fig. D: Domestic Coal Consumption (Units: Ten thousand tons)**

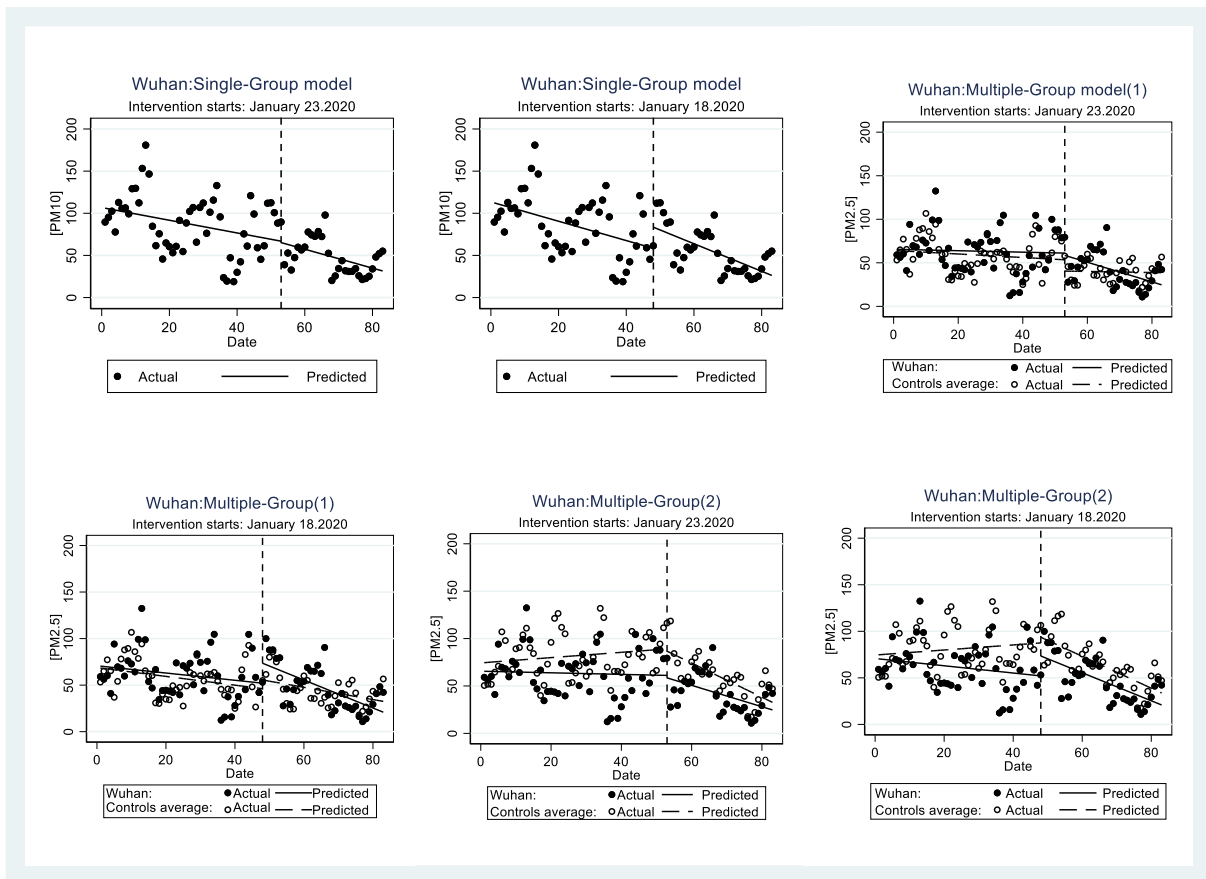

**Fig. E: Single and Multiple Groups Estimation Graph of ITSA**

**Table A**

Three stages average air quality from 2018-2020

| Variable          | 2018    |         |         | 2019   |        |        | 2020   |        |        |
|-------------------|---------|---------|---------|--------|--------|--------|--------|--------|--------|
|                   | Stage1* | Stage2* | Stage3* | Stage1 | Stage2 | Stage3 | Stage1 | Stage2 | Stage3 |
| PM <sub>2.5</sub> | 59.62   | 58.91   | 54.5    | 59.36  | 50.46  | 73.36  | 77.63  | 60.58  | 41.39  |
| PM <sub>10</sub>  | 109.02  | 86.65   | 95.11   | 93.91  | 72.01  | 98.74  | 92.76  | 68.19  | 58.21  |
| SO <sub>2</sub>   | 21.83   | 19.56   | 17.5    | 14.76  | 12.67  | 13.68  | 13.15  | 12.08  | 10.4   |

Note: Stage1 is ten days before spring festive; Stage2 is 15 days between Chinese New Year to Lantern Festival; Stage 3 is 14 days after Lantern Festival. The mean values are reported.

**Table B**

## Single and Multiple Groups Empirical Results of ITSA

|                                    | (1)<br>Single A       | (2)<br>Single B       | (3)<br>M_C1          | (4)<br>M_C1 B        | (5)<br>M_C2 A        | (6)<br>M_C2 B        |
|------------------------------------|-----------------------|-----------------------|----------------------|----------------------|----------------------|----------------------|
| T                                  | -0.752***<br>(0.282)  | -1.147***<br>(0.326)  | -0.203<br>(0.167)    | -0.471**<br>(0.189)  | 0.279<br>(0.223)     | 0.271<br>(0.276)     |
| Z                                  |                       |                       | 1.506<br>(8.560)     | 2.083<br>(8.937)     | -9.120<br>(9.524)    | -4.354<br>(9.995)    |
| Z×T                                |                       |                       | 0.119<br>(0.316)     | 0.081<br>(0.369)     | -0.362<br>(0.348)    | -0.661<br>(0.419)    |
| X53                                | -1.678<br>(11.730)    |                       | -12.947*<br>(6.665)  |                      | -2.384<br>(13.582)   |                      |
| X53×T                              | -0.369<br>(0.466)     |                       | 0.142<br>(0.332)     |                      | -2.077***<br>(0.634) |                      |
| Z×X53                              |                       |                       | 10.357<br>(13.558)   |                      | -0.207<br>(17.984)   |                      |
| Z×X53×T                            |                       |                       | -1.185**<br>(0.597)  |                      | 1.034<br>(0.805)     |                      |
| X48                                |                       | 25.019**<br>(12.498)  |                      | 9.358<br>(7.458)     |                      | 6.153<br>(12.481)    |
| X48×T                              |                       | -0.488<br>(0.481)     |                      | -0.186<br>(0.321)    |                      | -1.982***<br>(0.484) |
| Z×X48                              |                       |                       |                      | 12.069<br>(14.518)   |                      | 15.274<br>(17.618)   |
| Z×X48×T                            |                       |                       |                      | -0.927<br>(0.585)    |                      | 0.869<br>(0.688)     |
| Constant                           | 106.052***<br>(8.009) | 112.369***<br>(8.327) | 64.006***<br>(4.993) | 68.342***<br>(5.128) | 74.631***<br>(6.521) | 74.779***<br>(6.820) |
| F-test                             | 24                    | 25.54                 | 8.45                 | 8.33                 | 10.86                | 11.25                |
| Postintervention<br>Trends         | 1.121***<br>(0.37)    | -1.634***<br>(0.35)   |                      |                      |                      |                      |
| Postintervention<br>Trends-Treated |                       |                       | -1.127***<br>(0.411) | -1.504***<br>(0.37)  | -1.127***<br>(0.411) | -1.504***<br>(0.369) |
| Postintervention<br>Trends-Control |                       |                       | -0.061<br>(0.281)    | -0.658<br>(0.258)    | -1.799***<br>(0.585) | -1.711***<br>(0.388) |
| Difference                         |                       |                       | -1.066**<br>(0.498)  | -0.846*<br>(0.451)   | 0.672<br>(0.715)     | 0.207<br>(0.535)     |
| Observations                       | 83                    | 83                    | 415                  | 415                  | 498                  | 498                  |
